# Supplementary material
Source: publisher figshare collection journal article supplement (https://geolsoc.figshare.com/ndownloader/files/25819988)
Supplement: Supplementary file 1 [file 25819988]

## Sheet: Sheet1
Sample		Well-core	Depth (m)	Ultrasonic acoustic velocity																				Sample		Well-core	Depth (m)	Porosity Experiment
				Heigh (mm)											P-wave arrival time			S-wave arrival time		P-wave velocity (kms-1)	S-wave velocity (kms-1)							Dry mass (g)	Submerged mass (g)	Satured masss (g)	Bulk volume	Pore volume	Porosity	Density
				1	2	3	4	5	6	7	8	9	10	Mean	Δt1	Δt2	Δt3	Δt1	Δt2
RB	1	TG-27	1.25	25.98	26.86	25.7	26.56	25.46	25.93	26.62	25.28	26.45	26.48	26.132	4.781	4.681		7.381	7.331	5.52357	3.55247			RB	1	TG-27	1.25	50.45	29.35	50.5	21.15	0.05	0.236407	2.38534
RB	2		1.9	44.92	44.93	45.04	44.94	44.78	44.8	44.88	44.92	45.03	44.89	44.913	13.631	13.931		18.631	18.831	3.25905	2.39779			RB	2		1.9	52.1	31.81	55.33	23.52	3.23	13.733	2.21514
RB	3		2.9	44.04	43.49	43.5	42.96	42.76	43.45	43.58	43.44	43.56	43.71	43.449	13.531	12.731		15.931	15.631	3.30889	2.75325			RB	3		2.9	35.26	26.5	37.76	11.26	2.5	22.2025	3.13144
RB	4		3.9	47.45	46.67	46.45	46.14	46.52	47.06	47.43	48.79	47.82	47.68	47.201	13.681	13.731		16.231	16.931	3.44382	2.84669			RB	4		3.9	54.56	34.03	58.86	24.83	4.3	17.3178	2.19734
RB	5		4.9	45.59	45.43	45.28	45.34	45.3	45.24	45.2	45.25	45.28	45.36	45.327	13.481	12.581		14.231	14.231	3.4784	3.18509			RB	5		4.9	56.21	35.5	59.39	23.89	3.18	13.311	2.35287
RB	0		89.5	46.04	45.92	45.61	45.21	45.32	46.06	45.98	46.02	45.97	44.95	45.708	10.571	10.531		12.931	13.231	4.3321	3.49423			RB	0		89.5	61.55	37.05	62.14	25.09	0.59	2.35153	2.45317
RB	6		97.2	66.27	66.45	66.88	66.22	66.24	66.12	66.27	66.2	66.38	66.3	66.333	14.381	14.381		22.431	21.031	4.61254	3.05246			RB	6		97.2	51.81	31.66	53.45	21.79	1.64	7.52639	2.3777
RB	7		97.7	48.28	48.54	48.38	48.14	48	48.35	48.34	48.31	48.27	48.01	48.262	18.131	16.081	15.391	23.031	20.631	3.06698	2.21071			RB	7		97.7	28.47	15.29	30.03	14.74	1.56	10.5834	1.93148
RB	8		98.3	39.79	40.02	39.8	39.68	39.82	39.68	39.92	39.88	39.67	39.84	39.81	17.131	15.331		23.831	24.231	2.45271	1.65661			RB	8		98.3	29.42	18.39	29.74	11.35	0.32	2.81938	2.59207
RB	9		98.55	47.79	47.75	47.87	47.4	47.54	47.77	47.73	47.07	47.53	47.73	47.618	18.581	14.131	16.081	18.731	17.331	3.15226	2.6409			RB	9		98.55	27.92	16.25	28.58	12.33	0.66	5.3528	2.2644
RB	10		99	52.47	51.84	52.36	52.15	52.23	51.95	51.98	51.92	52.45	52.35	52.17	8.331	16.431	17.431	24.231	26.631	3.08133	2.05143			RB	10		99	29.69	19.55	31.67	12.12	1.98	16.3366	2.44967
RB	11	TG-100	223	44.78	44.73	44.82	44.88	45.62	44.86	44.95	44.82	44.79	44.68	44.893	9.431	9.231		11.231	11.681	4.81117	3.91873			RB	11	TG-100	223	44.35	23.19	44.76	21.57	0.41	1.90079	2.0561
RB	12		223.5	51.78	51.72	51.89	51.72	51.76	51.99	51.81	52.22	51.68	52.03	51.86	14.031	14.131		20.431	20.331	3.68298	2.54453			RB	12		223.5	45.48	23.8	46.23	22.43	0.75	3.34374	2.02764
RB	13		224.5	47.66	47.47	47.1	46.98	47.03	47.21	47.19	47.8	47.61	47.08	47.313	15.031	14.531		19.331	18.731	3.20093	2.4861			RB	13		224.5	37.28	22.97	39.7	16.73	2.42	14.465	2.22833
RB	14		228.5	50.44	50.11	50.38	50.62	50.22	49.98	50.52	49.89	50.55	50.11	50.282	14.631	16.631	14.331	17.631	17.331	3.47227	2.87638			RB	14		228.5	42.09	26.73	43.75	17.02	1.66	9.75323	2.47297
RB	15		232.4	39.59	39.46	39.21	39.46	39.45	39.41	39.05	39.5	39.42	39.63	39.418	14.231	12.531		17.831	18.131	2.94582	2.1922			RB	15		232.4	34.3	18.54	35.33	16.79	1.03	6.1346	2.04288
RB	16		236.4	50.84	50.63	50.9	50.86	50.72	51.33	51.27	51.19	50.88	51.14	50.976	16.731	16.131		19.531	20.981	3.10243	2.51659			RB	16		236.4	43.97	26.1	45.3	19.2	1.33	6.92708	2.2901
RB	17		240.4	41.66	40.27	41.99	41.88	42.07	42.09	41.89	41.51	41.95	41.66	41.697	15.431	12.731		17.631	18.331	2.96122	2.31895			RB	17		240.4	30.63	16.71	32.16	15.45	1.53	9.90291	1.98252
RB	18		246.25	47.34	47.2	47.64	47.25	47.01	47.43	47.4	47.11	47.08	47.52	47.298	14.981	14.631		22.231	24.031	3.19452	2.04479			RB	18		246.25	39.8	23.05	41.89	18.84	2.09	11.0934	2.11253
RB	19		252.6	30.77	30.51	29.92	29.11	29.67	30.85	29.93	30.04	30.74	30.84	30.238	8.931	9.551		13.131	12.631	3.27216	2.34749			RB	19		252.6	27.88	15.55	29.37	13.82	1.49	10.7815	2.01737
RB	20		259.5	48.92	48.57	48.72	49.08	48.9	48.75	48.83	48.82	49.14	48.99	48.872	12.681	12.631		17.431	15.531	3.86157	2.96535			RB	20		259.5	58.79	35.9	62.06	26.16	3.27	12.5	2.24732
RB	21		268.5	33.7	33.34	33.38	33.95	33.65	33.03	33.11	33.08	33.48	33.84	33.456	10.731	9.931		14.931	14.631	3.23841	2.26345			RB	21		268.5	30.18	17.39	30.83	13.44	0.65	4.83631	2.24554
RB	22		277.95	38.07	38.12	37.93	38.05	37.97	38.13	38.17	38.04	37.75	38.03	38.026	12.781	12.131		17.131	17.031	3.05283	2.22622			RB	22		277.95	34.21	22.51	34.55	12.04	0.34	2.82392	2.84136
RB	23		286.7	46.93	46.92	46.85	46.88	46.79	46.44	46.63	46.52	46.72	46.89	46.757	16.031	14.881		17.031	17.231	3.02517	2.72938			RB	23		286.7	35.85	22.99	36.56	13.57	0.71	5.23213	2.64186
RB	24		297.8	48.63	49.11	48.4	48.74	49.17	49.09	48.82	48.6	47.81	48.83	48.72	15.231	15.431		24.431	22.231	3.17787	2.08821			RB	24		297.8	43.05	25.72	43.97	18.25	0.92	5.0411	2.3589
RB	25		305.1	39.34	39.56	39.42	39.79	39.51	39.42	39.77	39.88	39.78	39.61	39.608	13.681	11.731	12.131	18.331	16.331	3.31976	2.28538			RB	25		305.1	35.74	21.95	37.53	15.58	1.79	11.4891	2.29397
RB	26		312.8	50.64	50.28	50.57	50.23	50.24	50.43	50.3	50.25	50.15	50.21	50.33	17.131	16.331		20.031	17.031	3.00819	2.71599			RB	26		312.8	38.88	23.63	40.38	16.75	1.5	8.95522	2.32119
RB	27		316.85	49.58	48.64	49.72	48.68	48.65	49.09	49.39	49.25	49.01	49.07	49.108	16.831	16.181		24.031	24.831	2.97516	2.01007			RB	27		316.85	37.82	21.27	38.67	17.4	0.85	4.88506	2.17356
RB	28	TG-179	286.35	51.5	51.46	51.54	51.27	51.26	51.04	51.68	51.12	51.37	51.41	51.365	21.531	17.931	16.451	23.321	23.231	2.9879	2.20678			RB	28	TG-179	286.35	44.79	28.27	47.93	19.66	3.14	15.9715	2.27823
RB	29		284.35	48.63	49.03	48.83	48.47	48.91	48.81	48.75	48.7	48.74	48.96	48.783	16.481	15.731		20.231	20.631	3.02887	2.3877			RB	29		284.35	44.6	24.81	47.2	22.39	2.6	11.6123	1.99196
RB	30		281.9	51.34	51.61	51.47	51.91	51.37	51.35	51.28	51.35	51.19	51.5	51.437	17.231	15.284	15.681	19.731	19.431	3.32227	2.62688			RB	30		281.9	51.85	28.71	54.54	25.83	2.69	10.4142	2.00736
RB	31		281	44.36	44.4	43.72	44.18	44.22	44.44	44.03	44.42	44.22	44.3	44.229	13.881	14.081		18.431	19.931	3.16351	2.30588			RB	31		281	40.12	20.11	40.22	20.11	0.1	0.497265	1.99503
RB	32		280.1	47.1	47.23	47.22	47.42	47.28	47.13	46.84	46.56	46.48	46.6	46.986	11.181	11.311		13.331	13.231	4.17802	3.53784			RB	32		280.1	48.15	28.25	48.14	19.89	-0.01	0	2.42081
RB	33		275.15	48.94	48.74	48.61	48.59	48.6	49.02	48.87	49.07	48.63	48.72	48.779	10.231	10.111		14.631	14.731	4.79589	3.32259			RB	33		275.15	47.64	30.31	47.42	17.11	-0.22	0	2.78434
RB	34		274.5	47.71	47.51	47.61	47.72	47.64	47.93	47.9	47.68	47.42	47.51	47.663	13.231	12.831		15.331	15.931	3.65766	3.04926			RB	34		274.5	42.41	27.4	44.58	17.18	2.17	12.631	2.46857
RB	35		273.7	46.34	46.07	46.9	46.29	46.25	46.42	46.57	46.22	46.16	45.96	46.318	20.631	15.931	15.931	21.131	20.531	2.90741	2.22351			RB	35		273.7	42.75	26.66	44.51	17.85	1.76	9.85994	2.39496
RB	36		272.3	45.93	46.2	46.04	46.11	46.01	45.96	45.74	45.68	45.63	46.06	45.936	19.031	16.681	15.881	18.331	20.581	2.82145	2.36102			RB	36		272.3	42.2	22.18	44.38	22.2	2.18	9.81982	1.9009
RB	37		268.1	48.55	49.23	48.63	48.58	48.67	49.08	49.26	48.25	49.27	48.33	48.785	20.931	15.631	16.381	23.031	20.431	3.04792	2.24495			RB	37		268.1	44.13	27.47	46.27	18.8	2.14	11.383	2.34734
RB	38		265.2	49.99	49.8	49.86	49.43	49.47	49.37	49.68	49.48	49.66	49.91	49.665	17.231	15.981		18.131	20.031	2.99079	2.60285			RB	38		265.2	45.15	27.11	46.24	19.13	1.09	5.69786	2.36017
RB	39		262.6	50.6	50.65	50.48	50.85	50.57	50.52	50.99	50.83	51.28	50.74	50.751	21.231	15.681	16.031	17.831	19.731	3.20074	2.70225			RB	39		262.6	41.98	24.38	43.33	18.95	1.35	7.12401	2.2153
RB	40		258.1	49.1	49.49	50.56	50.79	50.9	50.57	50.31	49.3	49.35	49.03	49.94	20.231	16.431	16.581	20.931	21.681	2.71325	2.34394			RB	40		258.1	45.55	27.6	48.67	21.07	3.12	14.8078	2.16184
RB	41		253.2	49.97	50.46	50.4	49.94	50.12	49.94	49.97	50.04	50	50.41	50.125	15.331	14.481		17.781	18.281	3.36274	2.77993			RB	41		253.2	42.67	24.1	45.16	21.06	2.49	11.8234	2.02612
RB	42		250.2	48.64	48.62	48.47	48.73	48.45	48.47	48.39	48.64	48.51	48.49	48.541	16.631	14.831		18.131	18.531	3.08569	2.64803			RB	42		250.2	42.82	26.85	44.75	17.9	1.93	10.7821	2.39218
RB	43		247.05	45.87	46	46.24	46.58	45.91	46.06	46.09	46.32	45.85	46.02	46.094	15.731	14.081		16.531	17.931	3.09231	2.67506			RB	43		247.05	38.5	27.26	40.04	12.78	1.54	12.0501	3.01252
RB	44		242.45	44.52	44.91	44.68	44.7	44.51	44.63	44.46	44.61	44.55	44.91	44.648	14.031	12.481		16.031	15.731	3.36814	2.81141			RB	44		242.45	36.38	19.78	38.49	18.71	2.11	11.2774	1.94441
RB	45		241.25	46.62	46.11	46.04	46.05	46.24	45.25	46.12	46.21	45.81	46.14	46.059	15.631	13.931		19.631	19.031	3.11609	2.38265			RB	45		241.25	40.37	25.07	43.53	18.46	3.16	17.1181	2.18689
RB	46		237.2	47.39	47.72	47.81	47.49	47.3	47.75	47.23	47.62	47.77	47.88	47.596	10.531	10.391		14.331	14.931	4.54985	3.25309			RB	46		237.2	43.54	21.79	43.38	21.59	-0.16	-0.741084	2.01667
RB	47	TG-227	298.15	50.18	49.14	49.52	49.46	49.6	49.8	49.24	49.28	49.13	49.29	49.464	18.631	13.931	14.111	19.431	18.131	3.52785	2.63373			RB	47	TG-227	298.15	42.1	23.62	43.3	19.68	1.2	6.09756	2.13923
RB	48		298.4	46.13	46.03	46.17	46.27	45.94	45.95	46.28	45.91	46.28	46.39	46.135	10.031	10.091		14.631	14.831	4.58553	3.13183			RB	48		298.4	44.24	25.74	47.33	21.59	3.09	14.3122	2.0491
RB	49		299.4	40.29	39.85	40.68	40.25	39.79	40.33	40.94	40.85	40.14	40.31	40.343	9.481	9.431		15.331	14.031	4.26639	2.74797			RB	49		299.4	38.3	22.35	39.2	16.85	0.9	5.34125	2.273
RB	50		300.85	46.7	46.15	46.6	47.06	46.98	46.68	46.52	46.55	46.54	46.99	46.677	12.281	11.681		15.131	16.031	3.89592	2.99576			RB	50		300.85	40.06	25.02	43	17.98	2.94	16.3515	2.22803
RB	51		302.15	47.14	47.02	47.15	46.81	46.96	46.7	47.26	47.03	47.07	47.01	47.015	12.571	11.731		13.931	13.531	3.86923	3.424			RB	51		302.15	42.16	26.25	44.04	17.79	1.88	10.5677	2.36987
RB	52		305.05	47.01	46.78	46.76	46.41	46.62	46.7	47.13	46.95	46.92	47	46.828	13.231	12.031		16.631	14.831	3.70739	2.9768			RB	52		305.05	39.3	24.74	41.03	16.29	1.73	10.62	2.41252
RB	53		308.6	48.53	48.46	48.48	48.73	48.54	48.84	48.61	48.72	48.35	48.8	48.606	14.631	14.031		17.131	15.731	3.39167	2.95819			RB	53		308.6	39.73	24.69	42.62	17.93	2.89	16.1182	2.21584
RB	54		312.5	46.77	46.78	46.63	46.85	46.58	46.71	46.86	46.87	46.59	46.8	46.744	12.281	11.731		16.531	14.331	3.89339	3.02923			RB	54		312.5	42.27	24.89	44.25	19.36	1.98	10.2273	2.18337
RB	55		317.1	46.26	46.22	46.83	46.87	47.12	46.89	46.36	46.54	46.49	46.45	46.603	11.481	11.131		13.631	13.731	4.12197	3.4064			RB	55		317.1	42.23	26.27	42.16	15.89	-0.07	0	2.65765
RB	56		319.4	47.83	47.79	47.95	47.92	48.01	47.84	47.54	47.84	47.87	47.77	47.836	11.481	10.851		16.831	1.831	4.28408	5.12657			RB	56		319.4	40.35	26.1	41.97	15.87	1.62	10.2079	2.54253
RB	57		325.2	41.32	41.34	41.27	41.1	41.29	41.35	41.14	41.24	41.23	41.12	41.24	11.531	10.831		17.331	16.331	3.6884	2.45024			RB	57		325.2	33.56	26.39	36.07	9.68	2.51	25.9298	3.46694
RB	58		331.65	47.54	47.33	47.57	47.43	47.08	47.96	47.9	47.55	47.7	47.45	47.551	12.881	12.531		16.931	16.631	3.74241	2.83362			RB	58		331.65	40.18	23.15	42.01	18.86	1.83	9.70308	2.13043
RB	59		335.85	47.84	48.61	48.72	48.32	48.57	47.75	48.66	48.64	48.02	48.57	48.37	13.181	13.331		16.831	17.531	3.64891	2.81532			RB	59		335.85	42.37	26.15	44.85	18.7	2.48	13.262	2.26578
RB	60		340.3	47.64	47.76	47.79	47.75	47.88	47.87	47.67	47.94	47.66	47.85	47.781	14.731	13.781		24.431	22.431	3.35164	2.03922			RB	60		340.3	46.08	28.79	49.51	20.72	3.43	16.5541	2.22394
RB	61	CBM-100UF	4.8	16.49	16.05	16.49	16.6	15.55	17.27	16.69	16.38	15.85	15.75	16.312	7.781	6.351				2.30852				RB	61	CBM-100UF	4.8
RB	62		5.3	43.89	43.55	43.17	43.88	43.54	43.96	43.97	43.89	43.04	43.84	43.673	27.931	23.131				1.71059				RB	62		5.3
RB	63		5.8	34.4	35.41	35.4	34.81	34.32	33.31	33.08	33.7	34.17	34.45	34.305	19.131	16.531	16.281			2.091				RB	63		5.8
RB	64		89.8	51.43	51.76	51.89	51.91	52.32	52.05	52.41	52.74	52.27	51.7	52.048	10.931	10.031		15.831	14.831	4.96594	3.39495			RB	64		89.8	66.4	40.2	68.09	27.89	1.69	6.05952	2.38078
RB	65		90.3	34.49	34.54	33.42	32.95	31.3	31.98	33.95	34.84	35.02	33.16	33.565	8.631	8.781		11.531	11.331	3.85539	2.93631			RB	65		90.3	36.42	21.95	38.26	16.31	1.84	11.2814	2.23299
RB	66		90.8	36.68	36.51	36.21	36.61	36.62	36.74	36.93	36.74	36.83	36.46	36.633	10.391	9.031		14.331	14.831	3.77232	2.51238			RB	66		90.8	124.57	76.74	134.28	57.54	9.71	16.8752	2.16493
RB	67		91.3	44.56	43.8	42.54	44.26	43.52	42.96	42.64	43.32	44.43	42.74	43.477	11.781	11.071		13.731	13.331	3.80509	3.21314			RB	67		91.3	157.28	89.95	165.7	75.75	8.42	11.1155	2.0763
RB	68		92	56.25	56.95	57.82	59.36	59.42	59.06	57.39	57.07	56.53	56.33	57.618	16.331	15.481		18.231	18.131	3.62241	3.16913			RB	68		92	185.47	112.66	198.75	86.09	13.28	15.4257	2.15437
RB	69		93	28.72	28.54	28.58	28.85	28.94	28.84	28.21	28.38	28.09	27.9	28.505	9.281	7.181		11.531	11.431	3.46313	2.4828			RB	69		93	31.3	17.36	33.55	16.19	2.25	13.8975	1.93329
RB	70		94	44.29	41.78	44.02	43.1	43.33	41.2	44.18	41.27	44.31	44.45	43.193	10.731	10.091		14.231	13.831	4.14878	3.0784			RB	70		94	149.6	92.11	157.97	65.86	8.37	12.7088	2.27148
RB	71		95	34.55	34.44	34.79	35.01	35.8	36.32	36.57	35.89	35.2	34.77	35.334	8.481	8.831		11.031	12.631	4.08202	2.98656			RB	71		95	131.68	77.95	138.79	60.84	7.11	11.6864	2.16437
